# Supplementary material
Source: PubMed Central journal article supplement (PMC6990831)

## Supplementary Online Content

Bird ST, Tian F, Flowers N, et al. Idelalisib for treatment of relapsed follicular lymphoma and chronic lymphocytic leukemia: a comparison of treatment outcomes in clinical trial participants vs Medicare beneficiaries [published online December 19, 2019]. *JAMA Oncol*. doi:10.1001/jamaoncol.2019.3994

**eTable 1:** Baseline characteristics for Medicare beneficiaries receiving off-label IDEL for CLL and IDEL+R for FL

**eTable 2:** Rates of serious and fatal infections by anatomical location per 100 person-years by study cohort

**eTable 3:** Serious and fatal infection counts by infection type among all subjects and beneficiaries

**eTable 4.** Infectious organisms present in Medicare beneficiaries during inpatient stays or coded with receipt of an antibiotic

**eFigure 1.** Reasons for censoring by 90-day therapy increment in time to treatment discontinuation analysis among Medicare beneficiaries and trial subjects by study cohort

**eFigure 2.** Estimated hazard ratio for treatment discontinuation over time, Medicare vs. clinical Trial

**eFigure 3.** Hazard ratio for treatment discontinuation and mortality among clinical trial patients and Medicare beneficiaries with each 1-Unit increase in Charlson score

**eFigure 4.** Rates of serious infections by study cohort for  $\leq 6$  versus  $>6$  months of idelalisib treatment

This supplementary material has been provided by the authors to give readers additional information about their work.

**eTable 1: Baseline characteristics for Medicare beneficiaries receiving off-label IDEL for CLL and IDEL+R for FL, in reference to other study cohorts**

|                                         | FOLLICULAR LYMPHOMA |                |               | CHRONIC LYMPHOCYTIC LEUKEMIA |                |                |
|-----------------------------------------|---------------------|----------------|---------------|------------------------------|----------------|----------------|
|                                         | IDEL                |                | IDEL+R        | IDEL+R                       |                | IDEL           |
| Characteristic, %                       | Study 101-09        | Medicare       | Medicare      | Study 312-0116 <sup>1</sup>  | Medicare       | Medicare       |
|                                         | <i>n</i> = 26       | <i>n</i> = 305 | <i>n</i> = 51 | <i>n</i> = 89                | <i>n</i> = 294 | <i>n</i> = 250 |
| <b>Age</b>                              |                     |                |               |                              |                |                |
| 65-74                                   | 69.2                | 45.2           | 45.1          | 64.0                         | 47.6           | 39.2           |
| ≥75                                     | 30.8                | 54.8           | 54.9          | 36.0                         | 52.4           | 60.8           |
| <b>Sex</b>                              |                     |                |               |                              |                |                |
| Female                                  | 46.2                | 54.8           | 58.8          | 33.7                         | 37.8           | 44.4           |
| <b>Race</b>                             |                     |                |               |                              |                |                |
| White                                   | 88.6                | 93.1           | 90.2          | 91.0                         | 89.1           | 87.6           |
| Asian                                   | 3.8                 | 1.0            | ---           | ---                          | ---            | 0.8            |
| Black                                   | ---                 | 2.6            | 5.8           | 3.4                          | 8.2            | 7.2            |
| Other                                   | 7.6                 | 3.3            | 4.0           | 5.6                          | 2.7            | 4.4            |
| <b>Region</b>                           |                     |                |               |                              |                |                |
| United States                           | 50.0                | 100            | 100           | 70.8                         | 100            | 100.0          |
| <b>Charlson Score</b>                   |                     |                |               |                              |                |                |
| 2                                       | 73.1                | 34.1           | 29.4          | 34.8                         | 30.6           | 28.0           |
| 3                                       | 15.4                | 14.1           | 15.7          | 41.6                         | 17.7           | 18.4           |
| 4                                       | 7.7                 | 12.8           | 13.7          | 15.7                         | 15.6           | 15.2           |
| ≥5                                      | 3.8                 | 39.0           | 41.2          | 7.9                          | 36.1           | 38.4           |
| <b>Baseline Comorbidity<sup>2</sup></b> |                     |                |               |                              |                |                |
| Cardiac                                 | 34.6                | 63.6           | 56.9          | 30.7                         | 71.4           | 78.0           |
| Endocrine                               | 23.1                | 63.0           | 64.7          | 34.1                         | 59.9           | 71.2           |
| Gastrointestinal                        | 46.2                | 81.6           | 82.4          | 68.2                         | 77.6           | 83.6           |
| Hepatobiliary                           | 3.8                 | 26.2           | 33.3          | 4.5                          | 23.8           | 26.8           |

| Characteristic, %                       | FOLLICULAR LYMPHOMA              |                            |                           | CHRONIC LYMPHOCYTIC LEUKEMIA                    |                            |                            |
|-----------------------------------------|----------------------------------|----------------------------|---------------------------|-------------------------------------------------|----------------------------|----------------------------|
|                                         | IDEL                             |                            | IDEL+R                    | IDEL+R                                          |                            | IDEL                       |
|                                         | Study<br>101-09<br><i>n</i> = 26 | Medicare<br><i>n</i> = 305 | Medicare<br><i>n</i> = 51 | Study<br>312-0116 <sup>1</sup><br><i>n</i> = 89 | Medicare<br><i>n</i> = 294 | Medicare<br><i>n</i> = 250 |
| <b>Baseline Comorbidity<sup>2</sup></b> |                                  |                            |                           |                                                 |                            |                            |
| Immune system                           | 26.9                             | 41.3                       | 35.3                      | 19.3                                            | 55.8                       | 59.6                       |
| Infections and infestations             | 38.5                             | 70.8                       | 72.5                      | 53.4                                            | 81.0                       | 84.4                       |
| Metabolism and nutrition                | 42.3                             | 78.0                       | 86.3                      | 56.8                                            | 85.7                       | 87.6                       |
| Musculoskeletal and connective tissue   | 53.8                             | 82.3                       | 94.1                      | 56.8                                            | 84.7                       | 90.4                       |
| Nervous system                          | 19.2                             | 47.5                       | 56.9                      | 40.9                                            | 44.2                       | 56.8                       |
| Psychiatric                             | 30.8                             | 35.7                       | 37.3                      | 39.8                                            | 30.3                       | 34.4                       |
| Renal and urinary disorders             | 11.5                             | 64.6                       | 58.8                      | 55.7                                            | 63.9                       | 73.2                       |
| Respiratory, thoracic, and mediastinal  | 23.1                             | 76.1                       | 80.4                      | 56.8                                            | 81.3                       | 88.8                       |
| Skin and subcutaneous tissue            | 23.1                             | 62.3                       | 68.6                      | 23.9                                            | 75.2                       | 74.4                       |
| Vascular                                | 57.7                             | 86.6                       | 76.5                      | 62.5                                            | 88.8                       | 89.6                       |
| <b>Prior Therapy: Groups</b>            |                                  |                            |                           |                                                 |                            |                            |
| Antibody - CD52                         | ---                              | ---                        | ---                       | 15.9                                            | 0.3                        | ---                        |
| Antibody - CD20                         | 100                              | 59.7                       | 58.8                      | 98.9                                            | 45.2                       | 37.6                       |
| Radiotherapeutic anti-CD20              | 15.4                             | 4.6                        | 2.0                       | 1.1                                             | ---                        | ---                        |
| DNA-crosslinker - alkylator             | 100                              | 33.1                       | 37.3                      | 94.3                                            | 22.8                       | 23.6                       |
| DNA-crosslinker - platinum based        | 26.9                             | 3.9                        | 7.8                       | 1.1                                             | 0.7                        | 0.8                        |
| Proteasome inhibitor                    | 15.4                             | 0.7                        | 2.0                       | 1.1                                             | ---                        | 2.0                        |
| Purine Analog                           | 11.5                             | 2.0                        | 2.0                       | 60.2                                            | 2.7                        | 3.6                        |
| Cereblon inhibitor                      | 3.8                              | 8.5                        | 3.9                       | 17.0                                            | 0.7                        | 1.2                        |
| Topoisomerase inhibitor                 | 69.2                             | 10.8                       | 15.7                      | 17.0                                            | 1.4                        | 3.2                        |
| Antimetabolite                          | 19.2                             | 4.6                        | 7.8                       | 1.1                                             | 1.0                        | 1.2                        |
| Microtubule Antagonist                  | 76.9                             | 13.4                       | 19.6                      | 30.7                                            | 2.0                        | 5.2                        |
| Other Therapy <sup>3</sup>              | 3.8                              | ---                        | ---                       | 3.4                                             | ---                        | ---                        |

<sup>1</sup> Renamed Study 312-0117 for the long-term follow-up extension phase

<sup>2</sup> Baseline comorbidity defined using the System Organ Class from the Medical Dictionary for Regulatory Activities (MedDRA)

<sup>3</sup> Other Therapy includes: BCL-inhibitor, Tyrosine Kinase Inhibitor, HDAC inhibitor, mTOR inhibitor, CD19-directed T cell engager

**eTable 2: Rates of serious and fatal infections by anatomical location per 100 person-years by study cohort**

|                            | FOLLICULAR LYMPHOMA |          |                |          | CHRONIC LYMPHOCYTIC LEUKEMIA |          |          |
|----------------------------|---------------------|----------|----------------|----------|------------------------------|----------|----------|
|                            | IDEL                |          | IDEL+R         |          | IDEL+R                       |          | IDEL     |
|                            | Study 101-09        | Medicare | Study 313-0124 | Medicare | Study 312-0116               | Medicare | Medicare |
| <b>Fatal Infections</b>    |                     |          |                |          |                              |          |          |
| Total                      | 18.6                | 27.6     | 7.5            | 5.8      | 9.8                          | 18.4     | 46.1     |
| Bloodstream Infection      | ---                 | 12.0     | 2.5            | 2.9      | 3.8                          | 11.3     | 23.8     |
| CNS Infection              | ---                 | 0.6      | ---            | ---      | 0.8                          | ---      | ---      |
| Endocarditis               | ---                 | ---      | ---            | ---      | ---                          | ---      | ---      |
| Gastrointestinal Infection | ---                 | 0.6      | ---            | ---      | 0.8                          | ---      | 2.5      |
| Genitourinary Infection    | ---                 | 4.2      | ---            | ---      | ---                          | 0.5      | 5.8      |
| Respiratory Infection      | 12.5                | 9.6      | 2.5            | 2.9      | 4.5                          | 5.6      | 13.2     |
| Soft Tissue Infection      | ---                 | 0.6      | ---            | ---      | ---                          | 0.5      | 0.8      |
| Viral Infection            | 6.2                 | ---      | ---            | ---      | ---                          | ---      | ---      |
| Other Infection            | ---                 | ---      | 2.5            | ---      | ---                          | 0.5      | ---      |
| <b>Serious Infections</b>  |                     |          |                |          |                              |          |          |
| Total                      | 67.1                | 78.7     | 65.1           | 103.8    | 81.6                         | 80.1     | 118.2    |
| Bloodstream Infection      | ---                 | 31.1     | 10.4           | 35.7     | 19.2                         | 36.9     | 47.4     |
| CNS Infection              | ---                 | 0.6      | ---            | ---      | 1.5                          | 0.9      | ---      |
| Endocarditis               | ---                 | ---      | ---            | ---      |                              | 0.9      | 1.6      |
| Gastrointestinal Infection | ---                 | 7.8      | 13.0           | 21.0     | 4.6                          | 7.6      | 12.5     |
| Genitourinary Infection    | 6.3                 | 24.1     | 10.3           | 35.0     | 4.0                          | 14.8     | 38.5     |
| Respiratory Infection      | 48.9                | 43.8     | 26.6           | 55.6     | 39.8                         | 47.6     | 69.6     |
| Soft Tissue Infection      | 6.3                 | 5.4      | 2.5            | 12.2     | 4.8                          | 7.7      | 9.2      |
| Viral Infection            | 19.1                | 4.2      | 7.7            | ---      | 3.1                          | 4.8      | 2.5      |
| Other Infection            | 6.3                 | 4.2      | 15.7           | 5.9      | 19.5                         | 6.2      | 5.9      |

Rows may sum to more than the totals or subtotals because patients may have had more than one type of infection. A patient could only contribute one event to each row. Rates for serious infections included time from IDEL initiation until the first serious infection. PY = person-years, IDEL=idelalisib, IDEL+R = idelalisib with rituximab

**eTable 3: Serious and fatal infection counts by infection type among all subjects and beneficiaries**

|                            | FOLLICULAR LYMPHOMA              |                            |                                    |                           | CHRONIC LYMPHOCYTIC LEUKEMIA       |                            |                            |
|----------------------------|----------------------------------|----------------------------|------------------------------------|---------------------------|------------------------------------|----------------------------|----------------------------|
|                            | IDEL                             |                            | IDEL+R                             |                           | IDEL+R                             |                            | IDEL                       |
| Infection Type, # (%)      | Study<br>101-09<br><i>n</i> = 26 | Medicare<br><i>n</i> = 305 | Study<br>313-0124<br><i>n</i> = 62 | Medicare<br><i>n</i> = 51 | Study<br>312-0116<br><i>n</i> = 89 | Medicare<br><i>n</i> = 294 | Medicare<br><i>n</i> = 250 |
| <b>Fatal Infections</b>    |                                  |                            |                                    |                           |                                    |                            |                            |
| <i>Total</i>               | 3 (11.5)                         | 46 (15.1)                  | 3 (4.8)                            | 2 (3.9)                   | 13 (14.6)                          | 39 (13.3)                  | 57 (22.8)                  |
| Bloodstream Infection      | ---                              | 20 (6.6)                   | 1 (1.6)                            | 1 (2.0)                   | 5 (5.6)                            | 23 (7.8)                   | 29 (11.6)                  |
| Soft Tissue Infection      | ---                              | 1 (0.3)                    | ---                                | ---                       | ---                                | 2 (0.7)                    | 1 (0.4)                    |
| CNS Infection              | ---                              | 1 (0.3)                    | ---                                | ---                       | 1 (1.1)                            | ---                        | ---                        |
| Endocarditis               | ---                              | ---                        | ---                                | ---                       | ---                                | ---                        | ---                        |
| Gastrointestinal Infection | ---                              | 1 (0.3)                    | ---                                | ---                       | 1 (1.1)                            | ---                        | 3 (1.2)                    |
| Genitourinary Infection    | ---                              | 7 (2.3)                    | ---                                | ---                       | ---                                | 1 (0.3)                    | 8 (3.2)                    |
| Respiratory Infection      | 2 (7.7)                          | 16 (5.2)                   | 1 (1.6)                            | 1 (2.0)                   | 6 (6.7)                            | 12 (4.4)                   | 16 (6.4)                   |
| Viral Infection            | 1 (3.8)                          | ---                        | ---                                | ---                       | ---                                | ---                        | ---                        |
| Other Infection            | ---                              | ---                        | 1 (1.6)                            | ---                       | ---                                | 1 (0.3)                    | ---                        |
| <b>Serious Infections</b>  |                                  |                            |                                    |                           |                                    |                            |                            |
| <i>Total</i>               | 8 (30.8)                         | 121 (39.7)                 | 22 (35.5)                          | 26 (51.0)                 | 57 (64.0)                          | 142 (48.3)                 | 119 (47.6)                 |
| Bloodstream Infection      |                                  | 50 (16.4)                  | 4 (6.5)                            | 11 (21.6)                 | 22 (24.7)                          | 73 (24.8)                  | 55 (22.0)                  |
| Soft Tissue Infection      | 1 (3.8)                          | 10 (3.3)                   | 1 (1.6)                            | 4 (7.8)                   | 6 (6.7)                            | 18 (6.1)                   | 11 (4.4)                   |
| CNS Infection              | ---                              | 1 (0.3)                    | ---                                | ---                       | 2 (2.2)                            | 2 (0.7)                    | ---                        |
| Endocarditis               | ---                              | ---                        | ---                                | ---                       | ---                                | 2 (0.7)                    | 2 (0.8)                    |
| Gastrointestinal Infection | ---                              | 14 (4.6)                   | 5 (8.1)                            | 7 (13.7)                  | 6 (6.7)                            | 16 (5.4)                   | 15 (6.0)                   |
| Genitourinary Infection    | 1 (3.8)                          | 41 (13.4)                  | 4 (6.5)                            | 11 (21.6)                 | 5 (5.6)                            | 33 (11.2)                  | 48 (19.2)                  |
| Respiratory Infection      | 6 (23.1)                         | 70 (23.0)                  | 10 (16.1)                          | 16 (31.4)                 | 37 (41.6)                          | 93 (31.6)                  | 76 (30.4)                  |
| Viral Infection            | 3 (11.5)                         | 10 (3.3)                   | 3 (4.8)                            | ---                       | 4 (4.5)                            | 13 (4.4)                   | 4 (1.6)                    |
| Other Infection            | 1 (3.8)                          | 7 (2.3)                    | 6 (9.7)                            | 2 (3.9)                   | 22 (24.7)                          | 14 (4.8)                   | 8 (3.2)                    |

|                              | FOLLICULAR LYMPHOMA |                |                   |               | CHRONIC LYMPHOCYTIC LEUKEMIA |                |                |
|------------------------------|---------------------|----------------|-------------------|---------------|------------------------------|----------------|----------------|
|                              | IDEL                |                | IDEL+R            |               | IDEL+R                       |                | IDEL           |
| Infection Type, # (%)        | Study<br>101-09     | Medicare       | Study<br>313-0124 | Medicare      | Study<br>312-0116            | Medicare       | Medicare       |
|                              | <i>n = 26</i>       | <i>n = 305</i> | <i>n = 62</i>     | <i>n = 51</i> | <i>n = 89</i>                | <i>n = 294</i> | <i>n = 250</i> |
| <b>Bloodstream Infection</b> |                     |                |                   |               |                              |                |                |
| <i>Total</i>                 | ---                 | 50 (16.4)      | 4 (6.5)           | 11 (21.6)     | 22 (24.7)                    | 73 (24.8)      | 55 (22.0)      |
| <i>Total w/septic shock</i>  | ---                 | 18 (5.9)       | ---               | 3 (5.9)       | 6 (6.7)                      | 15 (5.1)       | 20 (8.0)       |
| CNS Infection                | ---                 | ---            | ---               | ---           | 1 (1.1)                      | 1 (0.3)        | ---            |
| Soft Tissue Infection        | ---                 | ---            | ---               | 1 (2.0)       | 3 (3.4)                      | 4 (1.4)        | 2 (0.8)        |
| Central Venous Catheter      | ---                 | 3 (1.8)        | ---               | ---           | ---                          | 2 (0.7)        | 2 (0.8)        |
| Endocarditis                 | ---                 | ---            | ---               | ---           | ---                          | 1 (0.3)        | 2 (0.8)        |
| Gastrointestinal Infection   | ---                 | 2 (1.2)        | ---               | 3 (5.9)       | 1 (1.1)                      | 3 (1.0)        | 5 (2.0)        |
| Genitourinary Infection      | ---                 | 10 (3.3)       | ---               | 5 (9.8)       | 2 (2.2)                      | 9 (3.1)        | 6 (2.4)        |
| Respiratory Infection        | ---                 | 28 (9.2)       | 1 (1.6)           | 2 (3.9)       | 5 (5.6)                      | 40 (13.6)      | 37 (14.8)      |
| Viral Infection              | ---                 | ---            | ---               | ---           | ---                          | 1 (0.3)        | ---            |
| Other Infection              | ---                 | ---            | ---               | 1 (2.0)       | ---                          | 5 (1.7)        | 2 (0.8)        |
| Not Specified                | ---                 | 14 (4.6)       | 3 (4.8)           | 2 (3.9)       | 13 (14.6)                    | 17 (5.8)       | 9 (3.6)        |
| <b>Soft Tissue Infection</b> |                     |                |                   |               | ---                          |                |                |
| <i>Total</i>                 | 1 (3.8)             | 10 (3.3)       | 1 (1.6)           | 4 (7.8)       | 6 (6.7)                      | 18 (6.1)       | 11 (4.4)       |
| Cellulitis                   | 1 (3.8)             | 5 (1.6)        | 1 (1.6)           | 3 (5.9)       | 5 (5.6)                      | 15 (5.1)       | 10 (4.0)       |
| Other                        | ---                 | 5 (1.6)        | ---               | 1 (2.0)       | 1 (1.1)                      | 3 (1.0)        | 1 (0.4)        |
| <b>CNS Infection</b>         |                     |                |                   |               |                              |                |                |
| <i>Total</i>                 | ---                 | 1 (0.3)        | ---               | ---           | 2 (2.2)                      | 2 (0.7)        | ---            |
| Meningitis                   | ---                 | ---            | ---               | ---           | ---                          | 2 (0.7)        | ---            |
| Other                        | ---                 | 1 (0.3)        | ---               | ---           | 2 (2.2)                      | ---            | ---            |

|                                   | FOLLICULAR LYMPHOMA |                |                   |               | CHRONIC LYMPHOCYTIC LEUKEMIA |                |                |
|-----------------------------------|---------------------|----------------|-------------------|---------------|------------------------------|----------------|----------------|
|                                   | IDEL                |                | IDEL+R            |               | IDEL+R                       |                | IDEL           |
| Infection Type, # (%)             | Study<br>101-09     | Medicare       | Study<br>313-0124 | Medicare      | Study<br>312-0116            | Medicare       | Medicare       |
|                                   | <i>n = 26</i>       | <i>n = 305</i> | <i>n = 62</i>     | <i>n = 51</i> | <i>n = 89</i>                | <i>n = 294</i> | <i>n = 250</i> |
| <b>CNS Infection</b>              |                     |                |                   |               |                              |                |                |
| <i>Total</i>                      | ---                 | 1 (0.3)        | ---               | ---           | 2 (2.2)                      | 2 (0.7)        | ---            |
| Meningitis                        | ---                 | ---            | ---               | ---           | ---                          | 2 (0.7)        | ---            |
| Other                             | ---                 | 1 (0.3)        | ---               | ---           | 2 (2.2)                      | ---            | ---            |
| <b>Endocarditis</b>               |                     |                |                   |               |                              |                |                |
| <i>Total</i>                      | ---                 | ---            | ---               | ---           | ---                          | 2 (0.7)        | 2 (0.8)        |
| <b>Gastrointestinal Infection</b> |                     |                |                   |               |                              |                |                |
| <i>Total</i>                      | ---                 | 14 (4.6)       | 5 (8.1)           | 7 (13.7)      | 6 (6.7)                      | 16 (5.4)       | 15 (6.0)       |
| Enterocolitis w/c.diff            | ---                 | 8 (2.6)        | ---               | 4 (7.8)       | 1 (1.1)                      | 8 (2.7)        | 11 (4.4)       |
| Gastroenteritis                   | ---                 | 1 (0.3)        | 5 (8.1)           | 1 (2.0)       | 3 (3.4)                      | 2 (0.7)        | 3 (1.2)        |
| Other GI Infection                | ---                 | 6 (2.0)        | ---               | 3 (5.9)       | 2 (2.2)                      | 6 (2.0)        | 2 (0.8)        |
| <b>Genitourinary Infection</b>    |                     |                |                   |               |                              |                |                |
| <i>Total</i>                      | 1 (3.8)             | 41 (13.4)      | 4 (6.5)           | 11 (21.6)     | 5 (5.6)                      | 33 (11.2)      | 48 (19.2)      |
| Pyelonephritis                    | ---                 | 4 (1.3)        | ---               | ---           | ---                          | 4 (1.4)        | ---            |
| GU Device, implant, Graft         | ---                 | 1 (0.3)        | ---               | ---           | ---                          | 1 (0.3)        | ---            |
| Urinary Tract Infection           | 1 (3.8)             | 39 (12.8)      | 4 (6.5)           | 11 (21.6)     | 4 (4.5)                      | 31 (10.5)      | 48 (19.2)      |
| Other GU Infection                | ---                 | ---            | ---               | ---           | 1 (1.1)                      | ---            | ---            |
| <b>Respiratory Infection</b>      |                     |                |                   |               |                              |                |                |
| <i>Total</i>                      | 6 (23.1)            | 70 (23.0)      | 10 (16.1)         | 16 (31.4)     | 37 (41.6)                    | 93 (31.6)      | 76 (30.4)      |
| Upper Respiratory                 | ---                 | 5 (1.6)        | ---               | 2 (3.9)       | 7 (7.9)                      | 11 (3.7)       | 5 (2.0)        |
| Lower Respiratory                 | 6 (23.1)            | 67 (22.0)      | 10 (16.1)         | 15 (29.4)     | 35 (39.3)                    | 88 (29.9)      | 74 (29.6)      |
| Pneumonia                         | 4 (15.4)            | 61 (20.0)      | 10 (16.1)         | 14 (27.5)     | 25 (28.1)                    | 78 (26.5)      | 69 (27.6)      |
| Location Not Specified            | ---                 | ---            | ---               | ---           | 1 (1.1)                      | ---            | ---            |



|                           | FOLLICULAR LYMPHOMA |                |                   |               | CHRONIC LYMPHOCYTIC LEUKEMIA |                |                |
|---------------------------|---------------------|----------------|-------------------|---------------|------------------------------|----------------|----------------|
|                           | IDEL                |                | IDEL+R            |               | IDEL+R                       |                | IDEL           |
| Infection Type, # (%)     | Study<br>101-09     | Medicare       | Study<br>313-0124 | Medicare      | Study<br>312-0116            | Medicare       | Medicare       |
|                           | <i>n = 26</i>       | <i>n = 305</i> | <i>n = 62</i>     | <i>n = 51</i> | <i>n = 89</i>                | <i>n = 294</i> | <i>n = 250</i> |
| <b>Viral Infection</b>    |                     |                |                   |               |                              |                |                |
| <i>Total</i>              | 3 (11.5)            | 10 (3.3)       | 3 (4.8)           | ---           | 4 (4.5)                      | 13 (4.4)       | 4 (1.6)        |
| CMV                       | 1 (3.8)             | 1 (0.3)        | 1 (1.6)           | ---           | 1 (1.1)                      | 2 (0.7)        | ---            |
| Herpes Zoster             | 2 (7.7)             | 5 (1.6)        | 1 (1.6)           | ---           | 1 (1.1)                      | 4 (1.4)        | 3 (1.2)        |
| Influenza                 | ---                 | 4 (1.3)        | 1 (1.6)           | ---           | ---                          | 7 (2.4)        | 1 (0.4)        |
| Other Virus               | ---                 | ---            | ---               | ---           | 2 (2.2)                      | ---            | ---            |
| <b>Other Infection</b>    |                     |                |                   |               |                              |                |                |
| <i>Total</i>              | 1 (3.8)             | 7 (2.3)        | 6 (9.7)           | 2 (3.9)       | 22 (24.7)                    | 14 (4.8)       | 8 (3.2)        |
| Devices, implants, grafts | ---                 | ---            | ---               | ---           | ---                          | 5 (1.7)        | ---            |
| Pathogen only specified   | ---                 | 1 (0.3)        | ---               | 1 (2.0)       | ---                          | 3 (1.0)        | 3 (1.2)        |
| Location not specified    | ---                 | ---            | ---               | ---           | 3 (3.4)                      | ---            | ---            |
| Other Infection           | 1 (3.8)             | 6 (2.0)        | 6 (9.7)           | 1 (2.0)       | 20 (22.5)                    | 7 (2.4)        | 5 (2.0)        |

Rows may sum to more than the totals or subtotals because patients may have had more than one type of infection.

**eTable 4: Infectious organisms present in Medicare beneficiaries during inpatient stays or coded with receipt of an antibiotic**

| Pathogen                    | Number         | Percent     |
|-----------------------------|----------------|-------------|
|                             | <i>n = 900</i> | <i>100%</i> |
| Candida                     | 58             | 6.4         |
| Escherichia coli            | 44             | 4.9         |
| Clostridium difficile       | 30             | 3.3         |
| Streptococcus               | 25             | 2.8         |
| Gram-negative               | 23             | 2.6         |
| Other Viral                 | 23             | 2.6         |
| Pseudomonas                 | 22             | 2.4         |
| Herpes Zoster               | 16             | 1.8         |
| MRSA                        | 16             | 1.8         |
| Influenza                   | 13             | 1.4         |
| Enterococcus                | 11             | 1.2         |
| Pneumocystis jirovecii      | 10             | 1.1         |
| Staphylococcus              | 10             | 1.1         |
| Klebsiella pneumoniae       | 7              | 0.8         |
| MSSA                        | 7              | 0.8         |
| Aspergillosis               | 4              | 0.4         |
| Cytomegalovirus             | 4              | 0.4         |
| Rhinovirus                  | 4              | 0.4         |
| Anaerobes                   | 3              | 0.3         |
| Respiratory Syncytial Virus | 3              | 0.3         |
| Cryptococcosis              | 2              | 0.2         |
| Legionella                  | 2              | 0.2         |
| Listeria                    | 1              | 0.1         |
| Mycoplasma                  | 1              | 0.1         |
| Pneumococcus                | 1              | 0.1         |
| Salmonella                  | 1              | 0.1         |

MRSA = Methicillin-resistant staphylococcus aureus; MSSA = methicillin susceptible staphylococcus aureus.

**eFigure1: Reasons for censoring in time to treatment discontinuation analysis by 90-day therapy increment among Medicare beneficiaries and trial subjects by study cohort**

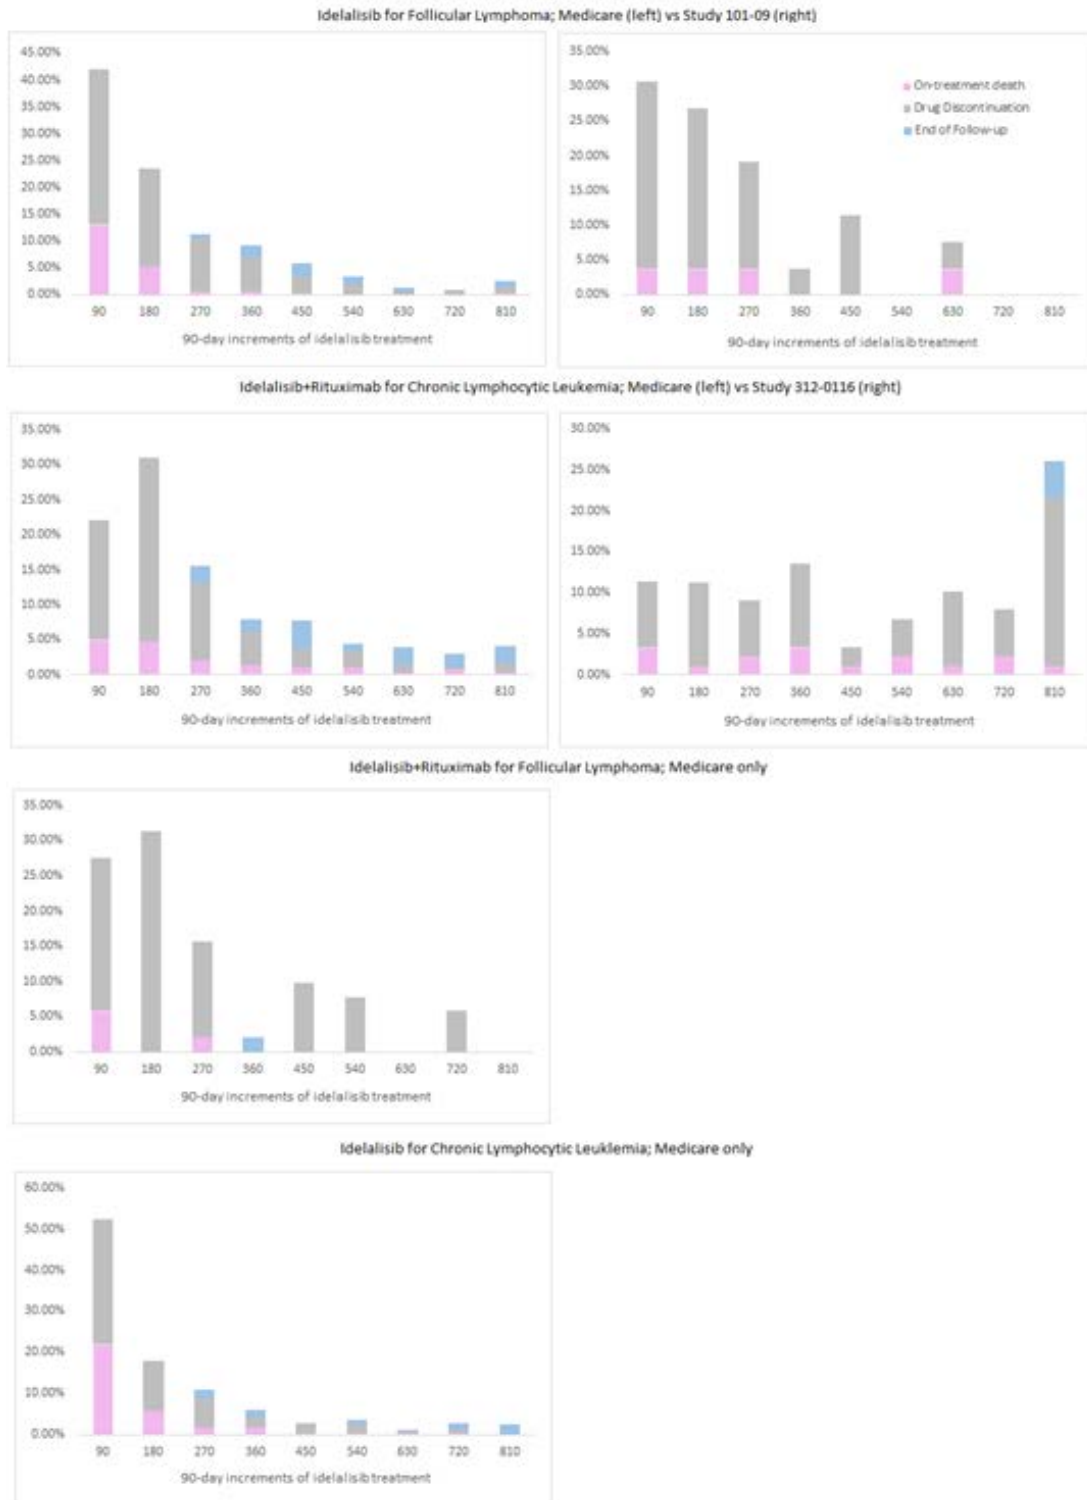

Medicare beneficiaries had higher rates of early mortality and treatment discontinuation than clinical trial subjects.

eFigure 2. Estimated hazard ratio for treatment discontinuation over time, Medicare vs. clinical Trial

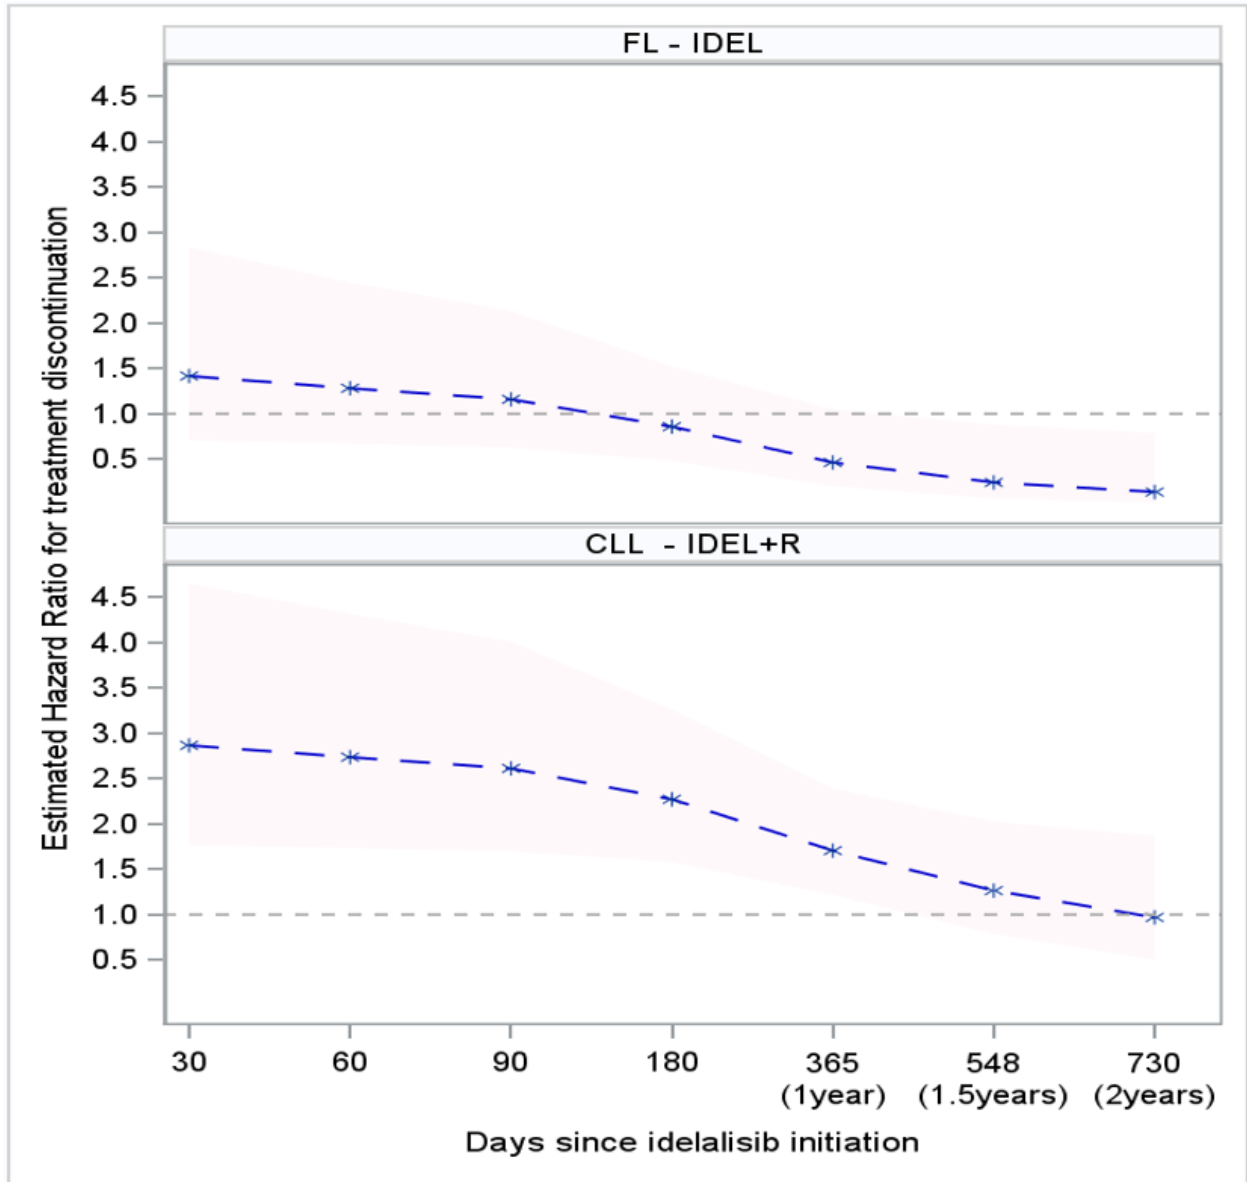

This figure depicts the change the Hazard Ratio for treatment discontinuation, by time since idelalisib initiation, when comparing Medicare beneficiaries versus clinical trial subjects. Horizontal dashed line represents a HR of 1.0.

**eFigure 3: Hazard ratio for treatment discontinuation and mortality among clinical trial patients and Medicare beneficiaries with each 1-Unit increase in Charlson score**

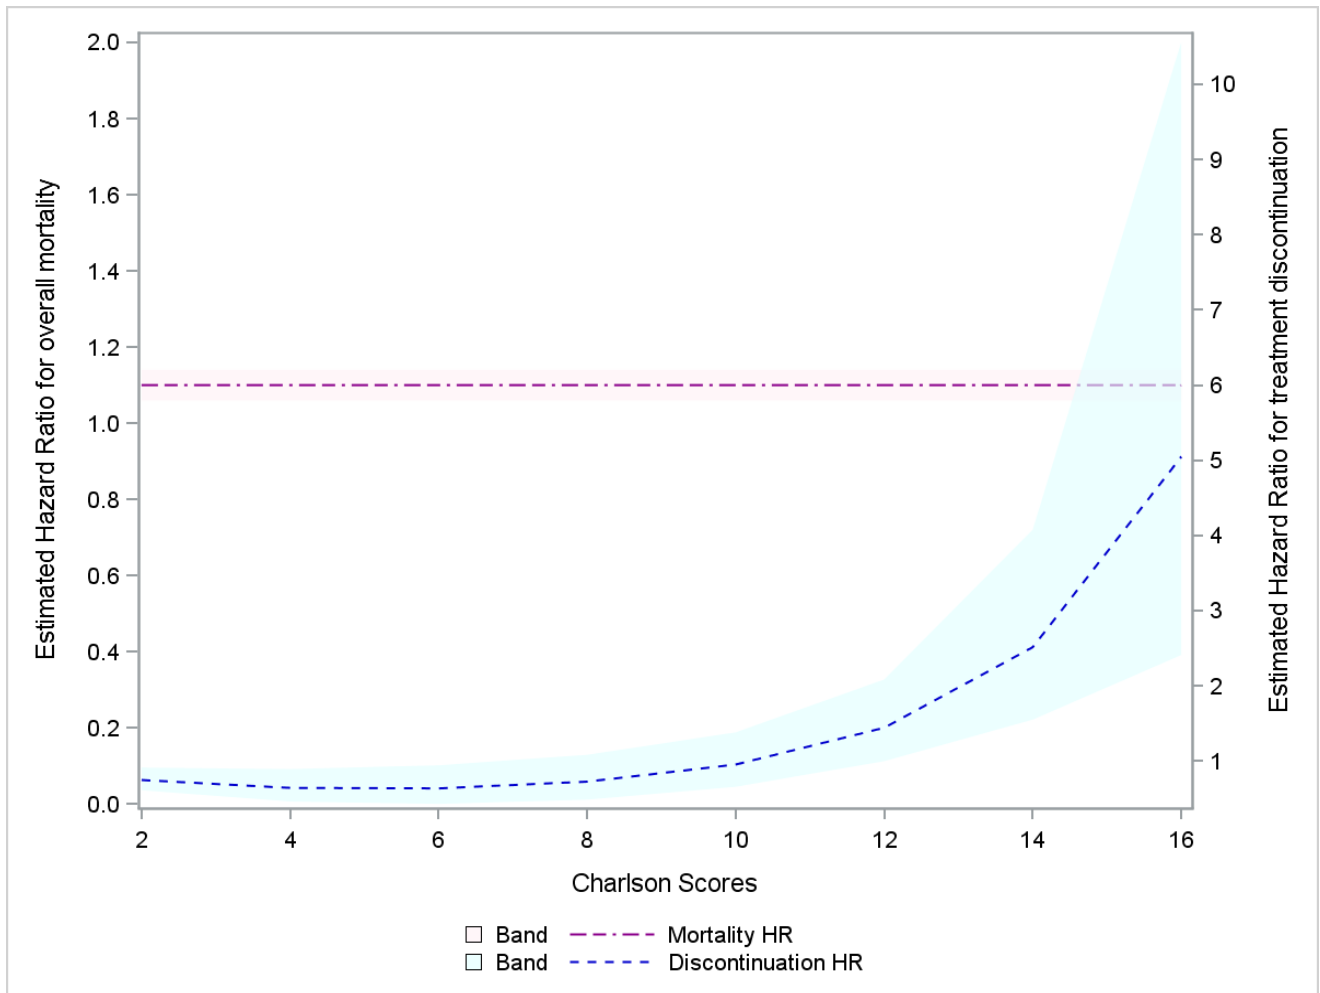

This figure depicts the impact of each 1-unit increase in Charlson score on the outcomes of treatment discontinuation and mortality. Multiple variable definitions for Charlson score were evaluated based on model fit, including Akaike Information Criterion, tests of linearity, and plots of log Hazard Ratio (HR). Charlson score had best model fit for the overall mortality outcome in 1-unit increments, while the best fit for the treatment discontinuation model was both a linear and quadratic term. As shown in the above graph, the HR for mortality is constant with each 1-unit increase in Charlson Score (HR 1.10, 95%CI 1.06-1.14). A higher Charlson score predicts a more (than linearly expected) increase in the HR for treatment discontinuation.

**eFigure 4: Rates of serious infections by study cohort for ≤6 versus >6 months of idelalisib treatment**

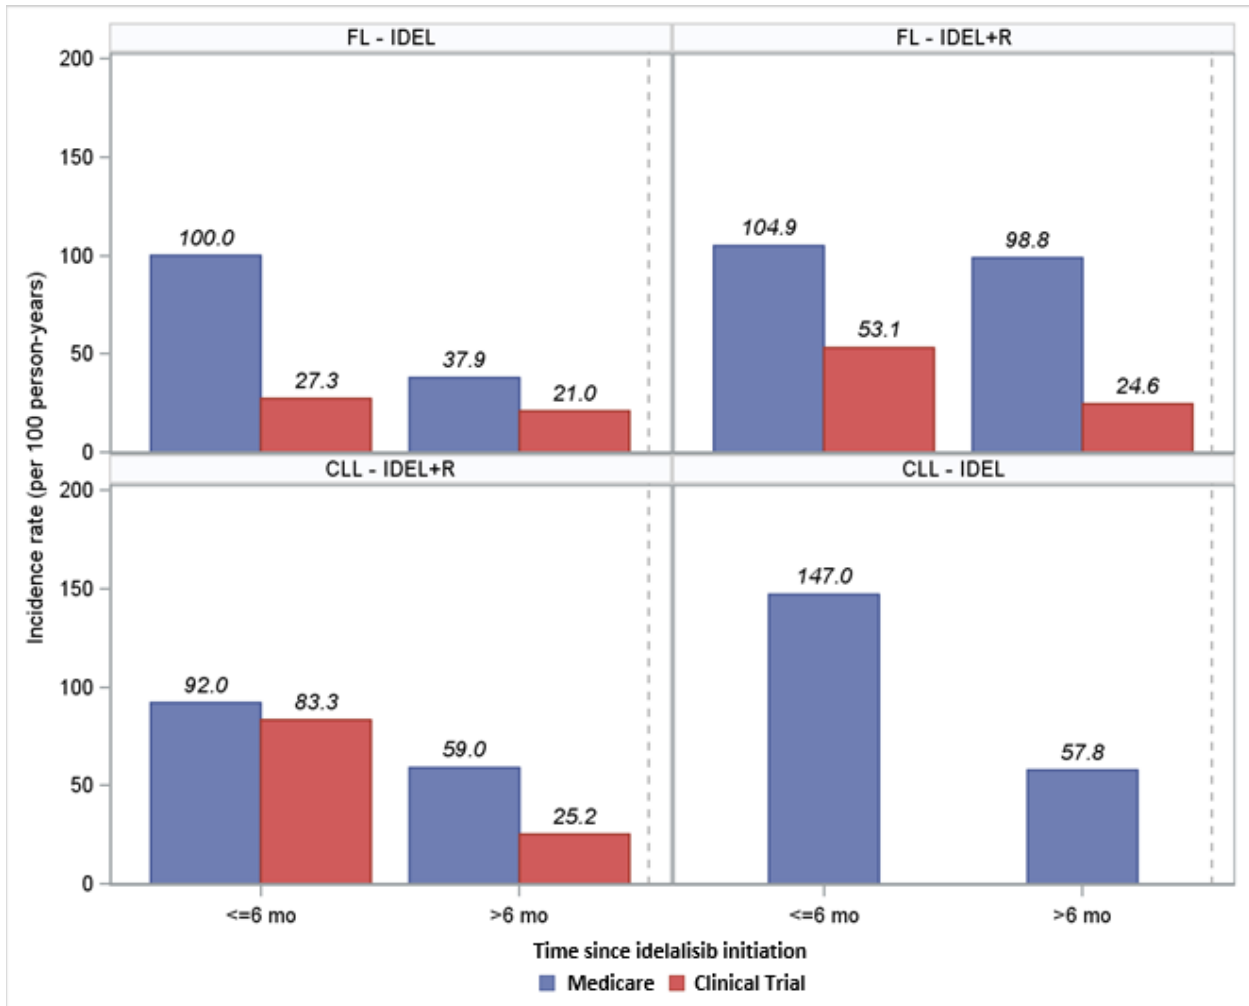

Supplement: jamaoncol-6-248-s001.pdf [file jamaoncol-6-248-s001.pdf]
